# Supplementary material
Source: publisher figshare collection journal article supplement (https://acs.figshare.com/ndownloader/files/5826405)
Supplement: Supplementary file 1 [file 5826405]

## Supplementary data

The HPLC system (Thermo Separation Products, Riviera Beach, FL) consisted of an auto-sampler (AS3000), an injector (100  $\mu$ L), a column oven (30°C), a pump (P3000), a diode array detector (UV6000) and a reverse-phase (RP) C18 column (25 x 4.6 mm, Goldsil, Teknokroma, Barcelona, Spain).

A linear gradient using water and methanol, both acidified with 0.01% (v/v) formic acid, at a flow rate of 1 mL/min was used. A liner gradient followed 2 min at 40% methanol, and reached 55% methanol in 8 min. Other substances were then eluted at 90% methanol, and the column was held at 40% methanol for 5 more minutes.

Stilbenoids were monitored at 306 nm.

GC-MS analyses were carried out with the Varian Saturn-2000, ion-trap GC-MS. A 1- $\mu$ L aliquot of the sample was injected into the Varian Star 3800 Gas Chromatograph. An HT8 capillary column was used (25 m long, 0.22 i.d., 0.25  $\mu$ m d.f.), at a flow rate of 1.5 mL/min and injector temperature of 280°C. Detector temperature was held at 280°C. The column temperature was set to 80°C for 1 min, raised to 250°C at a rate of 20°C/min, held for 1 min, raised to 290°C at a rate of 6°C/min, held for 2 min and then raised to 300°C and held for 10 min. The MS was operated in Electron Impact mode, and electron energy was set to 70 eV. Each analyzed sample (dried) was treated with 100  $\mu$ L of BSTFA and heated to 70°C for 15 min. The reagent was evaporated under nitrogen and the samples were dissolved in ethyl acetate.
